# Supplementary material for: Modeling the Predictive Value of Evidence-Based Referral Criteria to Support Healthy Gestational Weight Gain among an Australian Pregnancy Cohort
Source: MDPI journal article supplement (doi:10.3390/nu14020381), 2022-01-17
Supplement: s1 [file s1]

**Supplementary File S1: Range for expected healthy weight gain at 13-40 weeks gestation (and cut-points based on +/- 2 and 5 kg) for all Pre-pregnancy BMI categories.**

**BMI < 18.5kgm<sup>2</sup>**

| <b>Weeks</b> | <b>Min weight gain</b> | <b>Max weight gain</b> |  | <b>Min gain - 2kg cut point</b> | <b>Max gain + 2kg cut point</b> |  | <b>Min gain - 5kg cut point</b> | <b>Max gain + 5kg cut point</b> |
|--------------|------------------------|------------------------|--|---------------------------------|---------------------------------|--|---------------------------------|---------------------------------|
| 13           | 2                      | 0.5                    |  | 0                               | 2.5                             |  | -3                              | 5.5                             |
| 14           | 2.39                   | 1.15                   |  | 0.39                            | 3.15                            |  | -2.61                           | 6.15                            |
| 15           | 2.78                   | 1.8                    |  | 0.78                            | 3.8                             |  | -2.22                           | 6.8                             |
| 16           | 3.17                   | 2.45                   |  | 1.17                            | 4.45                            |  | -1.83                           | 7.45                            |
| 17           | 3.56                   | 3.1                    |  | 1.56                            | 5.1                             |  | -1.44                           | 8.1                             |
| 18           | 3.95                   | 3.75                   |  | 1.95                            | 5.75                            |  | -1.05                           | 8.75                            |
| 19           | 4.34                   | 4.4                    |  | 2.34                            | 6.4                             |  | -0.66                           | 9.4                             |
| 20           | 4.73                   | 5.05                   |  | 2.73                            | 7.05                            |  | -0.27                           | 10.05                           |
| 21           | 5.12                   | 5.7                    |  | 3.12                            | 7.7                             |  | 0.12                            | 10.7                            |
| 22           | 5.51                   | 6.35                   |  | 3.51                            | 8.35                            |  | 0.51                            | 11.35                           |
| 23           | 5.9                    | 7                      |  | 3.9                             | 9                               |  | 0.9                             | 12                              |
| 24           | 6.29                   | 7.65                   |  | 4.29                            | 9.65                            |  | 1.29                            | 12.65                           |
| 25           | 6.68                   | 8.3                    |  | 4.68                            | 10.3                            |  | 1.68                            | 13.3                            |
| 26           | 7.07                   | 8.95                   |  | 5.07                            | 10.95                           |  | 2.07                            | 13.95                           |
| 27           | 7.46                   | 9.6                    |  | 5.46                            | 11.6                            |  | 2.46                            | 14.6                            |
| 28           | 7.85                   | 10.25                  |  | 5.85                            | 12.25                           |  | 2.85                            | 15.25                           |
| 29           | 8.24                   | 10.9                   |  | 6.24                            | 12.9                            |  | 3.24                            | 15.9                            |
| 30           | 8.63                   | 11.55                  |  | 6.63                            | 13.55                           |  | 3.63                            | 16.55                           |
| 31           | 9.02                   | 12.2                   |  | 7.02                            | 14.2                            |  | 4.02                            | 17.2                            |
| 32           | 9.41                   | 12.85                  |  | 7.41                            | 14.85                           |  | 4.41                            | 17.85                           |
| 33           | 9.8                    | 13.5                   |  | 7.8                             | 15.5                            |  | 4.8                             | 18.5                            |
| 34           | 10.19                  | 14.15                  |  | 8.19                            | 16.15                           |  | 5.19                            | 19.15                           |

|    |       |       |  |       |       |  |      |       |
|----|-------|-------|--|-------|-------|--|------|-------|
| 35 | 10.58 | 14.8  |  | 8.58  | 16.8  |  | 5.58 | 19.8  |
| 36 | 10.97 | 15.45 |  | 8.97  | 17.45 |  | 5.97 | 20.45 |
| 37 | 11.36 | 16.1  |  | 9.36  | 18.1  |  | 6.36 | 21.1  |
| 38 | 11.75 | 16.75 |  | 9.75  | 18.75 |  | 6.75 | 21.75 |
| 39 | 12.14 | 17.4  |  | 10.14 | 19.4  |  | 7.14 | 22.4  |
| 40 | 12.53 | 18.05 |  | 10.53 | 20.05 |  | 7.53 | 23.05 |

*\*Table create in excel I:\PregnancyAndReproduction\ShannaFealy\ExcessGWG\_CRE20111\Data\Excel*

# **BMI 18.5 kgm<sup>2</sup> - <25kgm<sup>2</sup>**

| <b>Weeks</b> | <b>Min weight gain</b> | <b>Max weight gain</b> |  | <b>Min gain - 2kg cut point</b> | <b>Max gain + 2kg cut point</b> |  | <b>Min gain - 5kg cut point</b> | <b>Max gain + 5kg cut point</b> |
|--------------|------------------------|------------------------|--|---------------------------------|---------------------------------|--|---------------------------------|---------------------------------|
| 13           | 2                      | 0.5                    |  | 0                               | 2.5                             |  | -3                              | 5.5                             |
| 14           | 2.35                   | 1.075                  |  | 0.35                            | 3.075                           |  | -2.65                           | 6.075                           |
| 15           | 2.7                    | 1.65                   |  | 0.7                             | 3.65                            |  | -2.3                            | 6.65                            |
| 16           | 3.05                   | 2.225                  |  | 1.05                            | 4.225                           |  | -1.95                           | 7.225                           |
| 17           | 3.4                    | 2.8                    |  | 1.4                             | 4.8                             |  | -1.6                            | 7.8                             |
| 18           | 3.75                   | 3.375                  |  | 1.75                            | 5.375                           |  | -1.25                           | 8.375                           |
| 19           | 4.1                    | 3.95                   |  | 2.1                             | 5.95                            |  | -0.9                            | 8.95                            |
| 20           | 4.45                   | 4.525                  |  | 2.45                            | 6.525                           |  | -0.55                           | 9.525                           |
| 21           | 4.8                    | 5.1                    |  | 2.8                             | 7.1                             |  | -0.2                            | 10.1                            |
| 22           | 5.15                   | 5.675                  |  | 3.15                            | 7.675                           |  | 0.15                            | 10.675                          |
| 23           | 5.5                    | 6.25                   |  | 3.5                             | 8.25                            |  | 0.5                             | 11.25                           |
| 24           | 5.85                   | 6.825                  |  | 3.85                            | 8.825                           |  | 0.85                            | 11.825                          |
| 25           | 6.2                    | 7.4                    |  | 4.2                             | 9.4                             |  | 1.2                             | 12.4                            |
| 26           | 6.55                   | 7.975                  |  | 4.55                            | 9.975                           |  | 1.55                            | 12.975                          |
| 27           | 6.9                    | 8.55                   |  | 4.9                             | 10.55                           |  | 1.9                             | 13.55                           |
| 28           | 7.25                   | 9.125                  |  | 5.25                            | 11.125                          |  | 2.25                            | 14.125                          |
| 29           | 7.6                    | 9.7                    |  | 5.6                             | 11.7                            |  | 2.6                             | 14.7                            |

|    |       |        |  |      |        |  |      |        |
|----|-------|--------|--|------|--------|--|------|--------|
| 30 | 7.95  | 10.275 |  | 5.95 | 12.275 |  | 2.95 | 15.275 |
| 31 | 8.3   | 10.85  |  | 6.3  | 12.85  |  | 3.3  | 15.85  |
| 32 | 8.65  | 11.425 |  | 6.65 | 13.425 |  | 3.65 | 16.425 |
| 33 | 9     | 12     |  | 7    | 14     |  | 4    | 17     |
| 34 | 9.35  | 12.575 |  | 7.35 | 14.575 |  | 4.35 | 17.575 |
| 35 | 9.7   | 13.15  |  | 7.7  | 15.15  |  | 4.7  | 18.15  |
| 36 | 10.05 | 13.725 |  | 8.05 | 15.725 |  | 5.05 | 18.725 |
| 37 | 10.4  | 14.3   |  | 8.4  | 16.3   |  | 5.4  | 19.3   |
| 38 | 10.75 | 14.875 |  | 8.75 | 16.875 |  | 5.75 | 19.875 |
| 39 | 11.1  | 15.45  |  | 9.1  | 17.45  |  | 6.1  | 20.45  |
| 40 | 11.45 | 16.025 |  | 9.45 | 18.025 |  | 6.45 | 21.025 |

*\*Table create in excel I:\PregnancyAndReproduction\ShannaFealy\ExcessGWG\_CRE20111\Data\Excel*

**BMI 25kgm<sup>2</sup> - <30 kgm<sup>2</sup>**

| <b>Weeks</b> | <b>Min weight gain</b> | <b>Max weight gain</b> |  | <b>Min gain - 2kg cut point</b> | <b>Max gain + 2kg cut point</b> |  | <b>Min gain - 5kg cut point</b> | <b>Max gain + 5kg cut point</b> |
|--------------|------------------------|------------------------|--|---------------------------------|---------------------------------|--|---------------------------------|---------------------------------|
| 13           | 2                      | 0.5                    |  | 0                               | 2.5                             |  | -3                              | 5.5                             |
| 14           | 2.19                   | 0.907                  |  | 0.19                            | 2.907                           |  | -2.81                           | 5.907                           |
| 15           | 2.38                   | 1.314                  |  | 0.38                            | 3.314                           |  | -2.62                           | 6.314                           |
| 16           | 2.57                   | 1.721                  |  | 0.57                            | 3.721                           |  | -2.43                           | 6.721                           |
| 17           | 2.76                   | 2.128                  |  | 0.76                            | 4.128                           |  | -2.24                           | 7.128                           |
| 18           | 2.95                   | 2.535                  |  | 0.95                            | 4.535                           |  | -2.05                           | 7.535                           |
| 19           | 3.14                   | 2.942                  |  | 1.14                            | 4.942                           |  | -1.86                           | 7.942                           |
| 20           | 3.33                   | 3.349                  |  | 1.33                            | 5.349                           |  | -1.67                           | 8.349                           |
| 21           | 3.52                   | 3.756                  |  | 1.52                            | 5.756                           |  | -1.48                           | 8.756                           |
| 22           | 3.71                   | 4.163                  |  | 1.71                            | 6.163                           |  | -1.29                           | 9.163                           |
| 23           | 3.9                    | 4.57                   |  | 1.9                             | 6.57                            |  | -1.1                            | 9.57                            |

|    |      |        |  |      |        |  |       |        |
|----|------|--------|--|------|--------|--|-------|--------|
| 24 | 4.09 | 4.977  |  | 2.09 | 6.977  |  | -0.91 | 9.977  |
| 25 | 4.28 | 5.384  |  | 2.28 | 7.384  |  | -0.72 | 10.384 |
| 26 | 4.47 | 5.791  |  | 2.47 | 7.791  |  | -0.53 | 10.791 |
| 27 | 4.66 | 6.198  |  | 2.66 | 8.198  |  | -0.34 | 11.198 |
| 28 | 4.85 | 6.605  |  | 2.85 | 8.605  |  | -0.15 | 11.605 |
| 29 | 5.04 | 7.012  |  | 3.04 | 9.012  |  | 0.04  | 12.012 |
| 30 | 5.23 | 7.419  |  | 3.23 | 9.419  |  | 0.23  | 12.419 |
| 31 | 5.42 | 7.826  |  | 3.42 | 9.826  |  | 0.42  | 12.826 |
| 32 | 5.61 | 8.233  |  | 3.61 | 10.233 |  | 0.61  | 13.233 |
| 33 | 5.8  | 8.64   |  | 3.8  | 10.64  |  | 0.8   | 13.64  |
| 34 | 5.99 | 9.047  |  | 3.99 | 11.047 |  | 0.99  | 14.047 |
| 35 | 6.18 | 9.454  |  | 4.18 | 11.454 |  | 1.18  | 14.454 |
| 36 | 6.37 | 9.861  |  | 4.37 | 11.861 |  | 1.37  | 14.861 |
| 37 | 6.56 | 10.268 |  | 4.56 | 12.268 |  | 1.56  | 15.268 |
| 38 | 6.75 | 10.675 |  | 4.75 | 12.675 |  | 1.75  | 15.675 |
| 39 | 6.94 | 11.082 |  | 4.94 | 13.082 |  | 1.94  | 16.082 |
| 40 | 7.13 | 11.489 |  | 5.13 | 13.489 |  | 2.13  | 16.489 |

*\*Table create in excel I:\PregnancyAndReproduction\ShannaFealy\ExcessGWG\_CRE20111\Data\Excel*

**BMI  $\geq$  30kgm<sup>2</sup>**

| <b>Weeks</b> | <b>Min weight gain</b> | <b>Max weight gain</b> |  | <b>Min gain - 2kg cut point</b> | <b>Max gain + 2kg cut point</b> |  | <b>Min gain - 5kg cut point</b> | <b>Max gain + 5kg cut point</b> |
|--------------|------------------------|------------------------|--|---------------------------------|---------------------------------|--|---------------------------------|---------------------------------|
| 13           | 2                      | 0.5                    |  | 0                               | 2.5                             |  | -3                              | 5.5                             |
| 14           | 2.11                   | 0.815                  |  | 0.11                            | 2.815                           |  | -2.89                           | 5.815                           |
| 15           | 2.22                   | 1.13                   |  | 0.22                            | 3.13                            |  | -2.78                           | 6.13                            |
| 16           | 2.33                   | 1.445                  |  | 0.33                            | 3.445                           |  | -2.67                           | 6.445                           |
| 17           | 2.44                   | 1.76                   |  | 0.44                            | 3.76                            |  | -2.56                           | 6.76                            |
| 18           | 2.55                   | 2.075                  |  | 0.55                            | 4.075                           |  | -2.45                           | 7.075                           |

|    |      |       |  |      |        |  |       |        |
|----|------|-------|--|------|--------|--|-------|--------|
| 19 | 2.66 | 2.39  |  | 0.66 | 4.39   |  | -2.34 | 7.39   |
| 20 | 2.77 | 2.705 |  | 0.77 | 4.705  |  | -2.23 | 7.705  |
| 21 | 2.88 | 3.02  |  | 0.88 | 5.02   |  | -2.12 | 8.02   |
| 22 | 2.99 | 3.335 |  | 0.99 | 5.335  |  | -2.01 | 8.335  |
| 23 | 3.1  | 3.65  |  | 1.1  | 5.65   |  | -1.9  | 8.65   |
| 24 | 3.21 | 3.965 |  | 1.21 | 5.965  |  | -1.79 | 8.965  |
| 25 | 3.32 | 4.28  |  | 1.32 | 6.28   |  | -1.68 | 9.28   |
| 26 | 3.43 | 4.595 |  | 1.43 | 6.595  |  | -1.57 | 9.595  |
| 27 | 3.54 | 4.91  |  | 1.54 | 6.91   |  | -1.46 | 9.91   |
| 28 | 3.65 | 5.225 |  | 1.65 | 7.225  |  | -1.35 | 10.225 |
| 29 | 3.76 | 5.54  |  | 1.76 | 7.54   |  | -1.24 | 10.54  |
| 30 | 3.87 | 5.855 |  | 1.87 | 7.855  |  | -1.13 | 10.855 |
| 31 | 3.98 | 6.17  |  | 1.98 | 8.17   |  | -1.02 | 11.17  |
| 32 | 4.09 | 6.485 |  | 2.09 | 8.485  |  | -0.91 | 11.485 |
| 33 | 4.2  | 6.8   |  | 2.2  | 8.8    |  | -0.8  | 11.8   |
| 34 | 4.31 | 7.115 |  | 2.31 | 9.115  |  | -0.69 | 12.115 |
| 35 | 4.42 | 7.43  |  | 2.42 | 9.43   |  | -0.58 | 12.43  |
| 36 | 4.53 | 7.745 |  | 2.53 | 9.745  |  | -0.47 | 12.745 |
| 37 | 4.64 | 8.06  |  | 2.64 | 10.06  |  | -0.36 | 13.06  |
| 38 | 4.75 | 8.375 |  | 2.75 | 10.375 |  | -0.25 | 13.375 |
| 39 | 4.86 | 8.69  |  | 2.86 | 10.69  |  | -0.14 | 13.69  |
| 40 | 4.97 | 9.005 |  | 2.97 | 11.005 |  | -0.03 | 14.005 |

*\*Table create in excel I:\PregnancyAndReproduction\ShannaFealy\ExcessGWG\_CRE20111\Data\Excel*

**Supplementary File S2: Cross tabulations describing the distribution of weight gain at visits 1, 2, 3 versus weight gain at visit 4.**

| <i>Time point/cut-point</i> |                                      |             | <i>Normal<br/>GWG<br/>(N(%))</i> | <i>Excess/Inadequate<br/>GWG (N(%))</i> |
|-----------------------------|--------------------------------------|-------------|----------------------------------|-----------------------------------------|
| 2kg cut point               | Visit 1 Refer                        | No referral | 38 (59%)                         | 16 (24%)                                |
|                             | Visit 1 Refer                        | Refer       | 26 (41%)                         | 51 (76%)                                |
|                             | Visit 2 Refer                        | No referral | 46 (72%)                         | 13 (19%)                                |
|                             | Visit 2 Refer                        | Refer       | 18 (28%)                         | 54 (81%)                                |
|                             | Visit 3 Refer                        | No referral | 54 (84%)                         | 6 (9.0%)                                |
|                             | Visit 3 Refer                        | Refer       | 10 (16%)                         | 61 (91%)                                |
|                             | Consecutive +/- 2kg at Visit 1 and 2 | No referral | 48 (75%)                         | 18 (27%)                                |
|                             | Consecutive +/- 2kg at Visit 1 and 2 | Refer       | 16 (25%)                         | 49 (73%)                                |
|                             | Consecutive +/- 2kg at Visit 2 and 3 | No referral | 57 (89%)                         | 15 (22%)                                |
|                             | Consecutive +/- 2kg at Visit 2 and 3 | Refer       | 7 (11%)                          | 52 (78%)                                |
| 5 kg cut point              | Visit 1 Refer                        | No referral | 86 (91%)                         | 22 (59%)                                |
|                             | Visit 1 Refer                        | Refer       | 8 (8.5%)                         | 15 (41%)                                |
|                             | Visit 2 Refer                        | No referral | 88 (94%)                         | 13 (35%)                                |
|                             | Visit 2 Refer                        | Refer       | 6 (6.4%)                         | 24 (65%)                                |
|                             | Visit 3 Refer                        | No referral | 91 (97%)                         | 5 (14%)                                 |
|                             | Visit 3 Refer                        | Refer       | 3 (3.2%)                         | 32 (86%)                                |
